# Supplementary material for: Gap openings in graphene regarding interfacial interaction from substrates
Source: Royal Society of Chemistry journal article supplement (doi:10.1039/c3cp55222e), 2014-01-01
Supplement: c3cp55222e2.pdf [file c3cp55222e2.pdf]

**Gap openings in graphene regarding interfacial interaction from substrates**

—Supplementary Information

*Y. F. Zhu, Q. Q. Dai, W. T. Zheng, Q. Jiang*

*Key Laboratory of Automobile Materials (Jilin University), Ministry of Education,  
and School of Materials Science and Engineering, Jilin University, Changchun,  
130022, China*

## 1. Methods to calculate atomic cohesive energy of graphene on the substrate

About  $E_{C=C}$  in GLs/BN, it can be given by  $E_{C=C} = (E_{\text{total}} - E_C - E_{\text{system}})/3$ , where  $E_{\text{total}}$ ,  $E_C$  and  $E_{\text{system}}$  denote the total energy of the whole system, the energy of a C atom removed from the graphene layer, and the energy of the system after removing the C atom, respectively. In the case of  $E_{C-C}$ ,  $E_{C=C}$  and  $E_{C-Si}$  with  $n = 1$  for GLs/SiC,  $E_{C-Si} = (E_{\text{total}} - E_{\text{graphene}} - E_{\text{SiC}})/2$ ,  $E_{C-C} = (E_{\text{graphene}} - E_{C(-Si)})/3$ , and  $E_{C=C} = (E_{\text{graphene}} - E_C - E_{C-C})/2$ , where  $E_{\text{total}}$  denotes the total energy of the whole system,  $E_{\text{graphene}}$  the energy of graphene layer,  $E_{\text{SiC}}$  the energy of SiC part,  $E_{C(-Si)}$  the energy of the C atom bonded to the Si atom of the substrate, and  $E_C$  the energy of the free C atom not bonded to the Si atom. In virtue of these, the values of  $E_{\text{total}}$ ,  $E_C$  and  $E_{\text{system}}$  for GLs/BN and  $E_{\text{total}}$ ,  $E_{\text{graphene}}$ ,  $E_{\text{SiC}}$ ,  $E_{C(-Si)}$  and  $E_C$  for GLs/SiC should be given in advance. When  $n = 2$ , the way to have  $E_{C=C}$  is similar to the above BN case. About GL/BN, the most stable stacking orders of graphene and BN will be considered, where one C is over B, while the other C is centered above an *h*-BN hexagon. As to GL/SiC, the SiC(0001) surface with the Si-termination is adopted. To explore them, the spin-polarized DFT calculations are performed using the Cambridge sequential total energy package.<sup>1</sup> The local density approximation with Ceperley and Alder-Perdew and Zunger<sup>2</sup> is employed to describe the exchange correlation effects.

## 2. Results of convergence between k-points

Table S1 Results of convergence between k-points

| <i>k</i> -points                              |                              | $6 \times 6 \times 1$ | $7 \times 7 \times 1$ | $8 \times 8 \times 1$ |
|-----------------------------------------------|------------------------------|-----------------------|-----------------------|-----------------------|
| graphene on <i>h</i> -BN substrate            | $d_{\text{graphene-BN}}$ (Å) | 3.398                 | 3.398                 | 3.398                 |
|                                               | band gap (meV)               | 36                    | 36                    | 36                    |
| graphene on 4H-SiC (0001) with Si termination | $d_{\text{Si-C}}$ (Å)        | 1.973                 | 1.973                 | 1.973                 |
|                                               | gap (eV)                     | 1.73                  | 1.73                  | 1.72                  |

In light of Table S1, the bandgap values and the interlayer distances between graphene and *h*-BN or 4H-SiC (0001) substrate keep unchanged with further increasing the *k*-points.

1. M. D. Segall, P. J. D. Lindan, M. J. Probert, C. J. Pickard, P. J. Hasnip, S. J. Clark and M. C. Payne, *J Phys-Condens Mat*, 2002, **14**, 2717-2744.
2. J. P. Perdew and A. Zunger, *Phys. Rev. B*, 1981, **23**, 5048-5079.
